# Supplementary material
Source: PubMed Central journal article supplement (PMC5291043)
Supplement: supp_pp.16.01641_PP2016-01641DR1_Supplemental_Material.pdf [file supp_pp.16.01641_PP2016-01641DR1_Supplemental_Material.pdf]

# Supplemental Table 1

**Supplemental Table 1. AtSLP2-specific protein interactors recovered from cell culture and root tissue.**

| Gene Name        | Locus Tag        | Cell Culture Pull-Downs |                    |                    |                    | Root Pull-Downs |                | Rosette Pull-Downs |                |    |
|------------------|------------------|-------------------------|--------------------|--------------------|--------------------|-----------------|----------------|--------------------|----------------|----|
|                  |                  | GFP_CTAP_control_1      | GFP_CTAP_control_2 | GFP_CTAP_control_3 | GFP_CTAP_control_4 | AtSLP1_ctAPa_1  | AtSLP2_ctAPa_1 | AtSLP1_ctAPa_2     | AtSLP2_ctAPa_2 |    |
| <b>AT1G18480</b> | <b>AT1G18480</b> |                         |                    |                    |                    | 5               | 25             |                    | 7              | 21 |
| <b>HSP60-3A</b>  | <b>AT3G13860</b> |                         |                    |                    |                    | 4               | 14             | 1                  |                | 5  |
| <b>AtMIA40</b>   | <b>AT5G23395</b> |                         |                    |                    |                    | 2               | 2              |                    | 1              | 2  |
| <b>AT1G72730</b> | <b>AT1G72730</b> |                         |                    |                    |                    | 3               | 3              | 6                  | 1              | 2  |
| <b>GSR 1</b>     | <b>AT5G37600</b> |                         |                    |                    |                    | 3               | 2              | 10                 |                | 2  |

Each interactor was identified via TAP pull-downs. Specificity of the interaction with AtSLP2 was determined relative to control pull-downs involving GFP-TAP or AtSLP1-TAP constructs. Total peptide number identified in each pull-down is presented.

## Supplemental Table 2

**Supplemental Table 2. Phosphorylated peptide substrates used in AtSLP2 assays.**

| <b>Name</b>      | <b>Phosphorylated Amino Acid</b> | <b>Sequence</b>          |
|------------------|----------------------------------|--------------------------|
| <b>RRP1B</b>     | pThr                             | SSKKVT*FGLN              |
| <b>BRCA1</b>     | pThr                             | QSPKVT*FECEQK            |
| <b>Ki67</b>      | pSer                             | KRRRV <b>S</b> *FGGH     |
| <b>B56</b>       | pSer                             | KRAEEFLT <b>S</b> *QELAL |
| <b>p38beta</b>   | pThr / pTyr                      | EEMT*GY*VATR             |
| <b>p38</b>       | pThr / pTyr                      | EMT*GY*VVTC              |
| <b>Rat SAPK3</b> | pTyr                             | RQADSEMTGY*VVTR          |
| <b>hSAPK4</b>    | pTyr                             | RHADAEMTGY*VVTR          |

Starred and bold amino acids denote phosphorylated residues.

## Supplemental Table 3

**Supplemental Table 3. Primers for qPCR analysis of GA-related genes.**

| Gene             | Primer Name | Primer Sequence             |
|------------------|-------------|-----------------------------|
| <b>At1g18480</b> | SLP2qLP     | 5'-ATCTTCCTGCCCAAGATCC-3'   |
|                  | SLP2 qRP    | 5'-CCATCTGTCCGACGAATCAA-3'  |
| <b>At5g25900</b> | GA3 qLP     | 5'-ACTTCTTGATGTCGGAAGCG-3'  |
|                  | GA3 qRP     | 5'-TTGCACAGACGATCTTGGAC-3'  |
| <b>At3g05120</b> | GID1A qLP   | 5'-TCTACGATACTTTTGTGCGC-3'  |
|                  | GID1A qRP   | 5'-TTAAAGCCACATTATGCGCG-3'  |
| <b>At3g03450</b> | RGL2 qLP    | 5'-TCAAGCTGGAGCTATGGGAA-3'  |
|                  | RGL2 qRP    | 5'-AGTGCATCTCCAAAACCTCT-3'  |
| <b>At1g14920</b> | RGA1 qLP    | 5'-GCGATCGATAAGGTTCTTGG-3'  |
|                  | RGA1 qRP:   | 5'-AAACCTCCGACATGACCTTG-3'  |
| <b>At5g23395</b> | MIA40 qLP   | 5'-AGGGATCAGACTGCGTGAATC-3' |
|                  | MIA40 qRP   | 5'-AGGAGGCTGCTCTTCCTTTTC-3' |
| <b>At1g13440</b> | REF qLP     | 5'-TTGGTGACAACAGGTCAAGCA-3' |
|                  | REF qRP     | 5'-AAACTTGTGCTCAATGCAATC-3' |

# Supplemental Figure S1

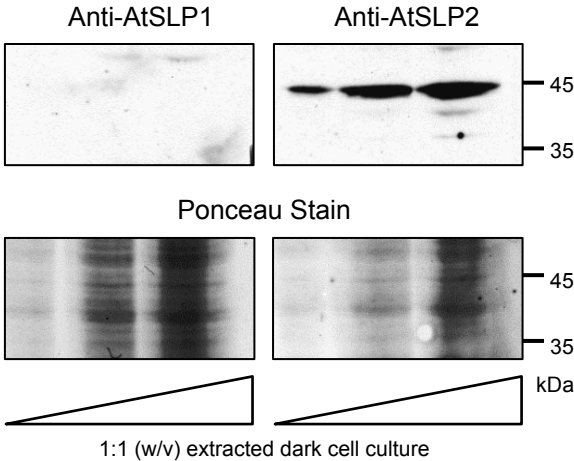

**Supplemental Figure S1. Immunoblot analysis of dark-grown, wild-type *A. thaliana* cell culture.** Cell culture extracted 1:1 (w/v) in 1x SDS-PAGE sample buffer was run in increasing volumes of 5, 15 and 30  $\mu$ l on SDS-PAGE, transferred to a membrane and probed with affinity-purified anti-AtSLP1 and anti-AtSLP2 IgG (Uhrig and Moorhead, 2011) at 1.5 and 1.2  $\mu$ g/mL, respectively.

## Supplemental Figure S2

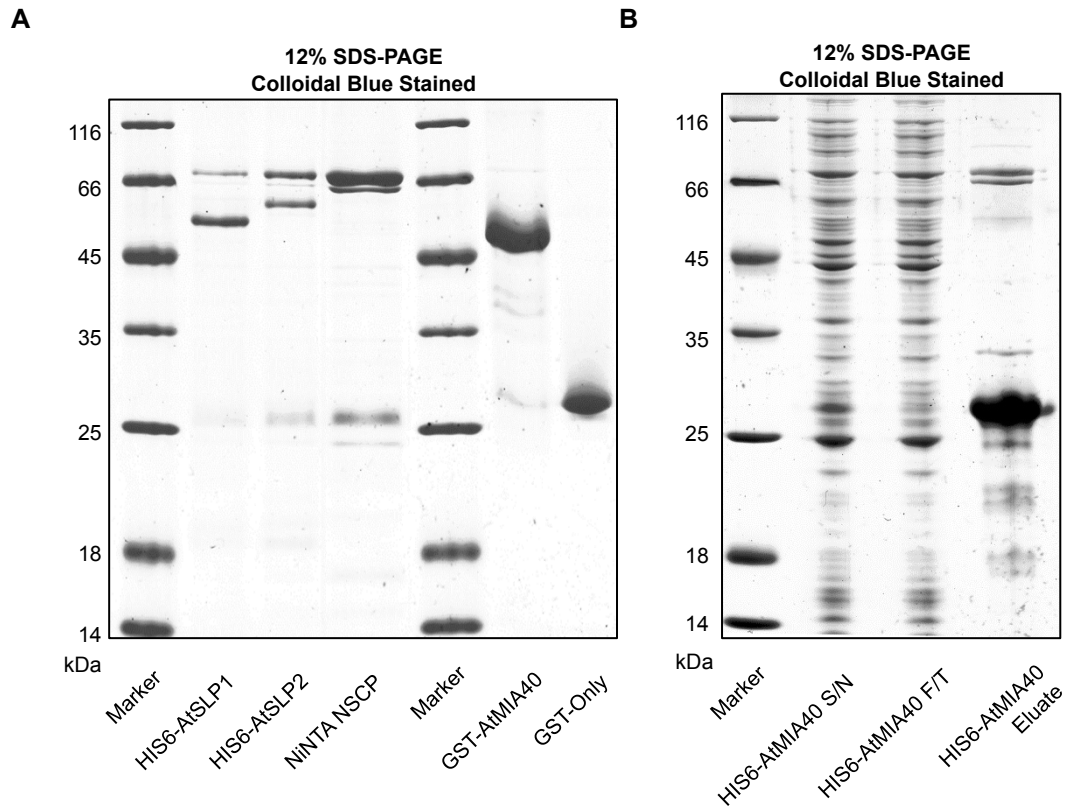

**Supplemental Figure S2. Colloidal blue-stained purified fractions of bacterially expressed and purified *A. thaliana* proteins used during *in vitro* experimentation.** A, Purified fractions of HIS6-tagged AtSLP1, AtSLP2 and non-specific co-purifying proteins (NCSP) as well as GST-tagged AtMIA40 and GST-only. B, Purified HIS6-tagged AtMIA40 eluate along with clarified HIS6-AtMIA40-expressing bacterial cell supernatant (S/N) and Ni-NTA flow-through (F/T). Each lane was loaded with 5  $\mu$ g of total protein. Expression and purification conditions are presented in Methods section.

# Supplemental Figure S3

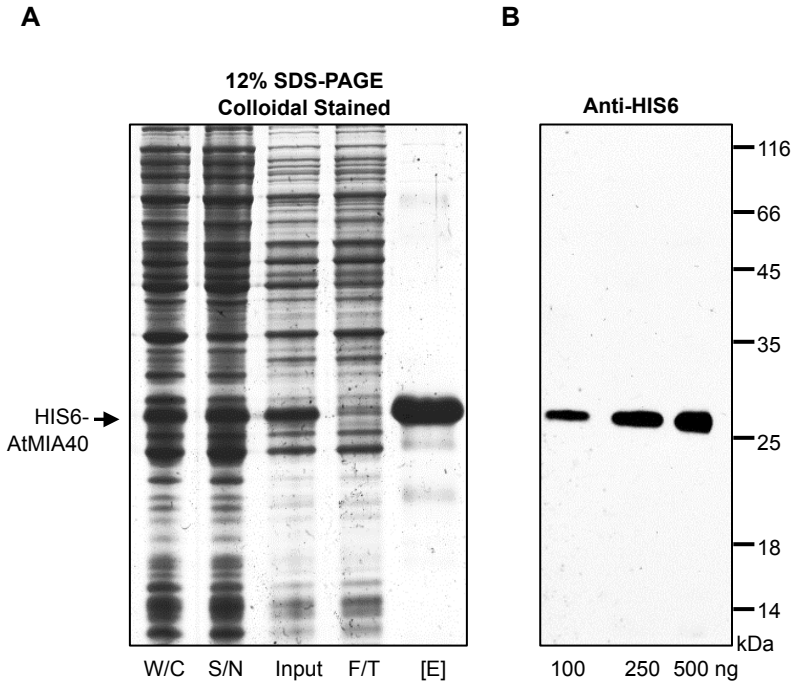

**Supplemental Figure S3. Purification of 6 M urea extracted HIS6-AtMIA40.** A, Purification scheme for 6 M urea extracted HIS6-AtMIA40. Whole cell (W/C), clarified supernatant (S/N), 6 M urea extracted protein pellet loaded on Ni-NTA (input), Ni-NTA flow-through (F/T) and concentrated Ni-NTA Eluate ([E]) are depicted. B, Dilution series of purified, 6 M urea-extracted HIS6-tagged AtMIA40 [E] subjected to immunoblot analysis using anti-HIS6 IgG. Each lane of the Colloidal stained gel contains 5 µg of total protein.

# Supplemental Figure S4

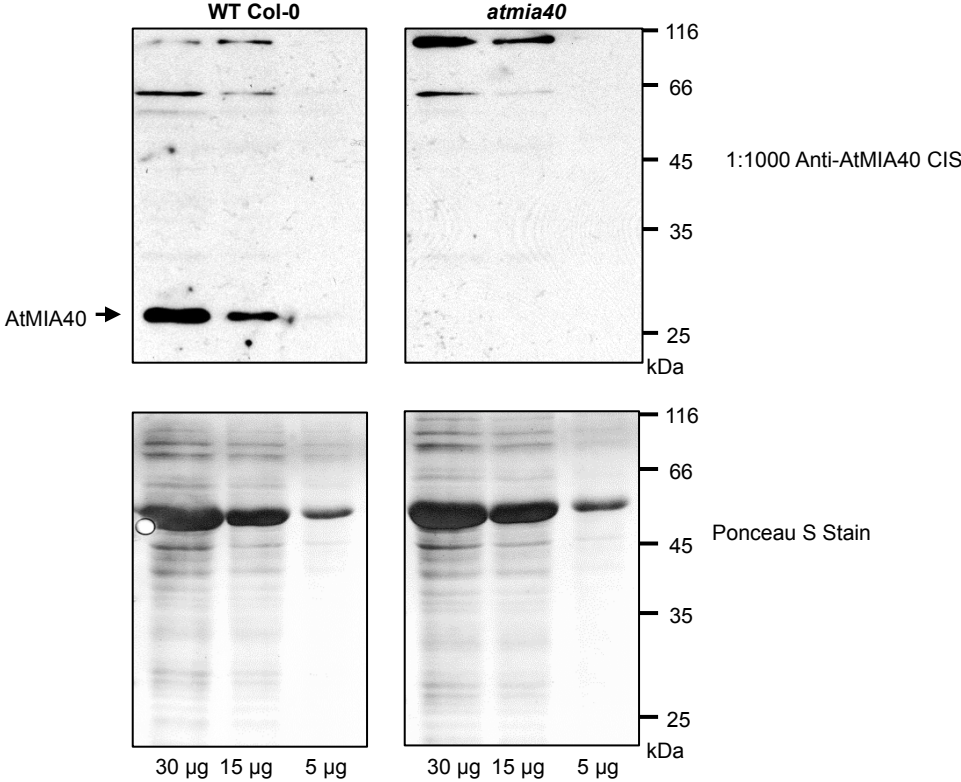

**Supplemental Figure S4. Analysis of anti-AtMIA40 crude immune serum.** Wild-type *A. thaliana* Col-0 (WT Col-0) and insertional *atmia40* knockout (*atmia40*) roots were employed to assess the detection of endogenous AtMIA40 by anti-MIA40 crude immune serum (CIS). Samples from WT Col-0 and *atmia40* were run on SDS-PAGE, transferred to a membrane and first stained with Ponceau S to show equal loading, then probed with 1000-fold diluted crude immune serum. The total protein of each lane is shown.

## Supplemental Figure S5

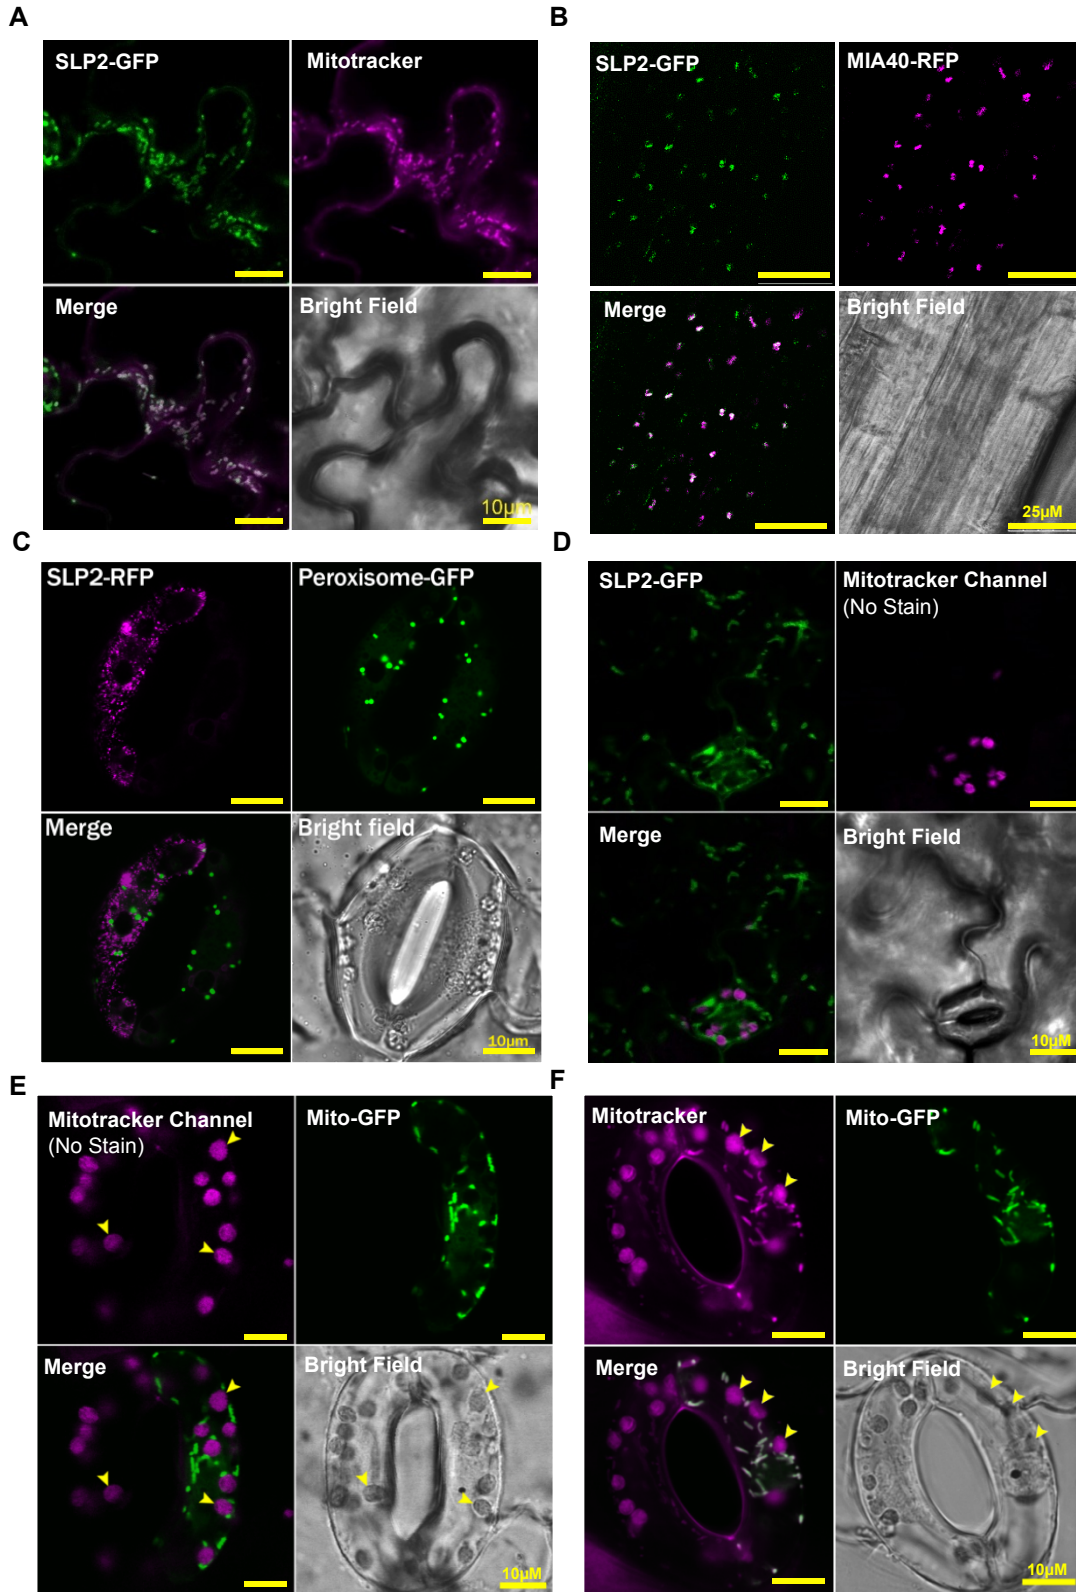

**Supplemental Figure S5. Confocal imaging of AtSLP2 and AtMIA40 in plant cells.** A, Pavement cells from  $35S_{pro}::AtSLP2-GFP$  *A. thaliana* plants co-localized with FarRed MitoTracker. B, Root cells from  $35S_{pro}::AtSLP2-GFP/35S_{pro}::AtMIA40-RFP$  *A. thaliana* plants. C, *Vicia faba* stomatal cells from  $35S_{pro}::AtSLP2-RFP$  plants imaged with peroxisome-targeted GFP. D, *A. thaliana* leaf cells from  $35S_{pro}::AtSLP2-GFP$  plants and the MitoTracker channel (no stain) reveal chloroplast autofluorescence. E, *Vicia faba* stomata transiently expressing mitochondrially targeted GFP. F, *Vicia faba* stomata transiently expressing mitochondrially targeted GFP and stained with MitoTracker. Yellow arrows (E and F) depict chloroplasts and their corresponding autofluorescence emitting at the same wavelength of the FarRed MitoTracker stain.



## Supplemental Figure S6

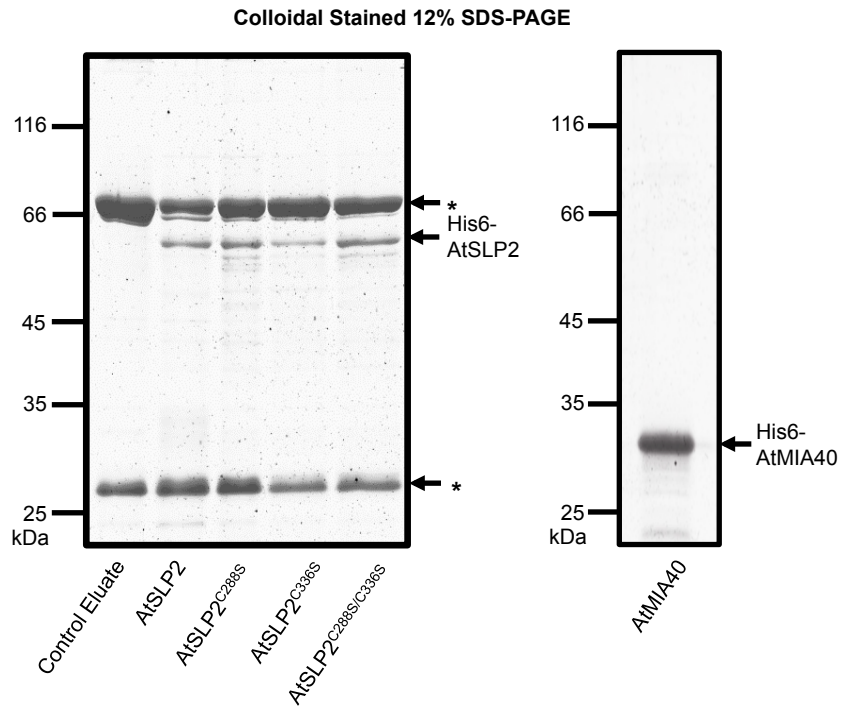

**Supplemental Figure S6. SDS-PAGE analysis of purified HIS6-AtSLP2 and AtMIA40.** Colloidal stained HIS6-AtSLP2 and HIS6-AtSLP2 cysteine site-directed mutants used in AtSLP2 phosphatase activity assays. From left to right, a control eluate, wild-type AtSLP2, AtSLP2<sup>C288S</sup>, AtSLP2<sup>C336S</sup> and double mutant AtSLP2<sup>C288S/C336S</sup>. The weak expressing SLP2 band of and its variants are indicated. Left panel contains 10  $\mu$ g of HIS6-AtSLP2 Ni-NTA eluate, while the right panel depicts 10  $\mu$ g of HIS6-AtMIA40 Ni-NTA eluate. AtSLP2 constitutes approximately 10% of total protein in each extract. Stars (\*) denote non-specific co-purifying proteins.

## Supplemental Figure S7

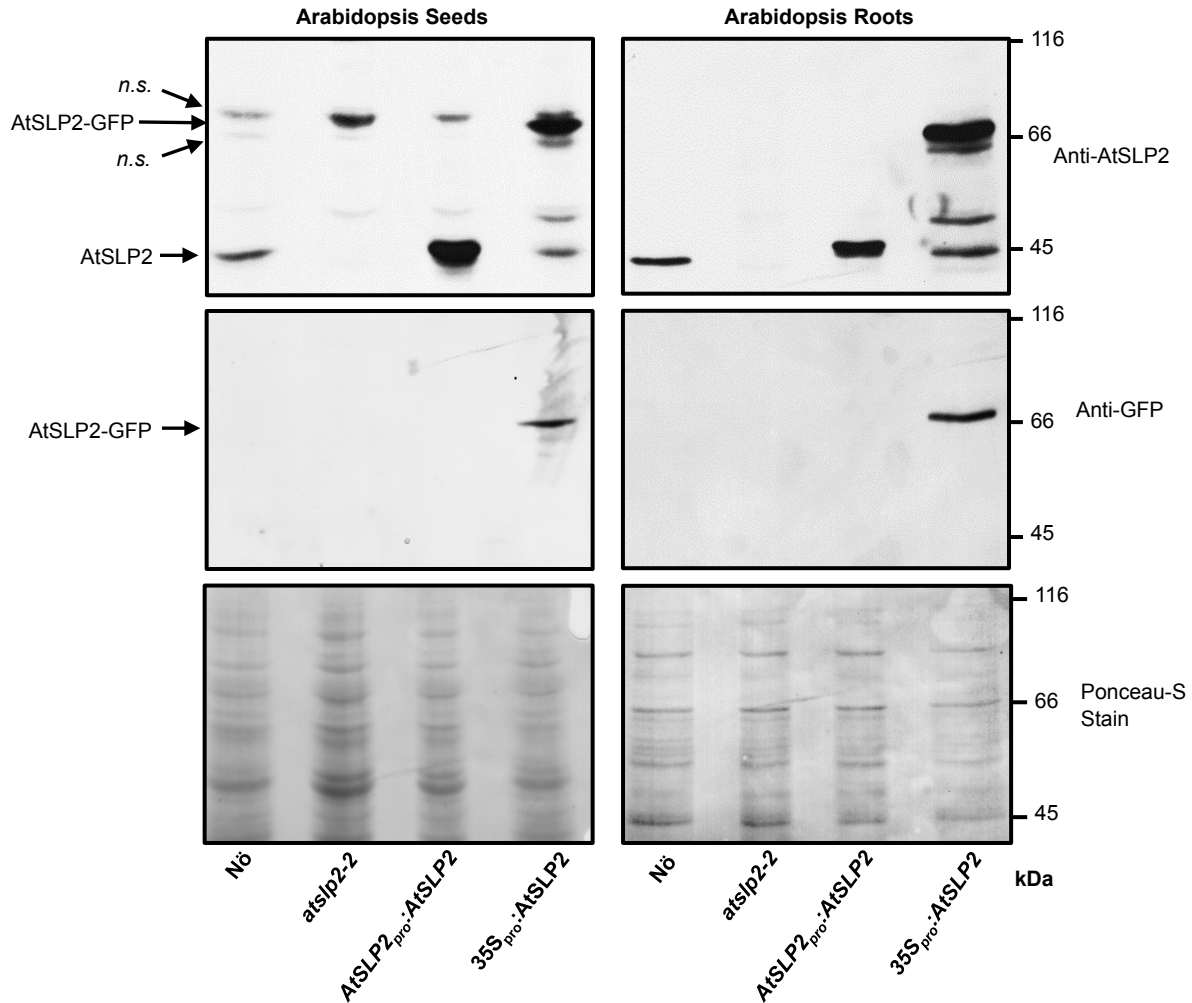

**Supplemental Figure S7. Immunoblot analysis of *atslp2-2*, WT NÖ, *AtSLP2<sub>pro</sub>::AtSLP2* complemented *atslp2-2* and *35S<sub>pro</sub>::AtSLP2* *A. thaliana* seed and root tissue.** As AtSLP2 protein is only observed in seed and root tissue (Uhrig and Moorhead, 2011), western blotting of these tissues from the plant lines employed in this study was conducted. Western blots were probed with 1.5 µg/mL affinity-purified rabbit anti-AtSLP2 IgG (Uhrig and Moorhead, 2011) and 1:1000 mouse anti-GFP IgG (Roche, #11814460001). Endogenous AtSLP2 can be seen at ~45 kDa, while *35S<sub>pro</sub>::AtSLP2* (GFP-AtSLP2) can be seen at ~68 kDa. Neither protein was detected in *atslp2-2* seeds and roots. Non-specific protein detection can be observed in seed samples and is denoted by *n.s.* Each lane contains 10 µg of total protein.

## Supplemental Figure S8

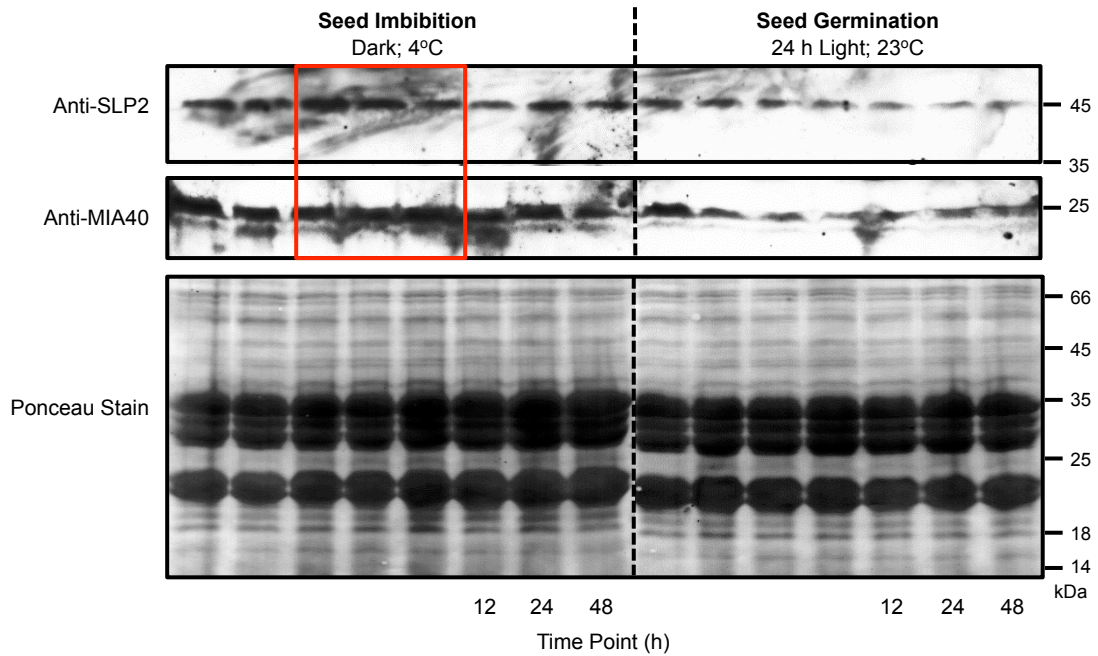

**Supplemental Figure S8. Western blot analysis of AtSLP2 and AtMIA40 expression in imbibed and germinating seeds.** Wild-type NÖ seeds were imbibed at 4°C for the given time prior to extraction. Time course samples were run on SDS-PAGE, transferred to a membrane and first stained with Ponceau S to show equal loading, then probed with 1.2 µg/mL affinity purified anti-AtSLP2 antibody (Uhrig and Moorhead, 2011) or 500-fold diluted anti-AtMIA40 crude immune serum. Both AtSLP2 and AtMIA40 are most abundant early in seed germination. Each lane contains 30 µg of total protein. Red box depicts peak AtSLP2 protein levels.

## Supplemental Figure S9

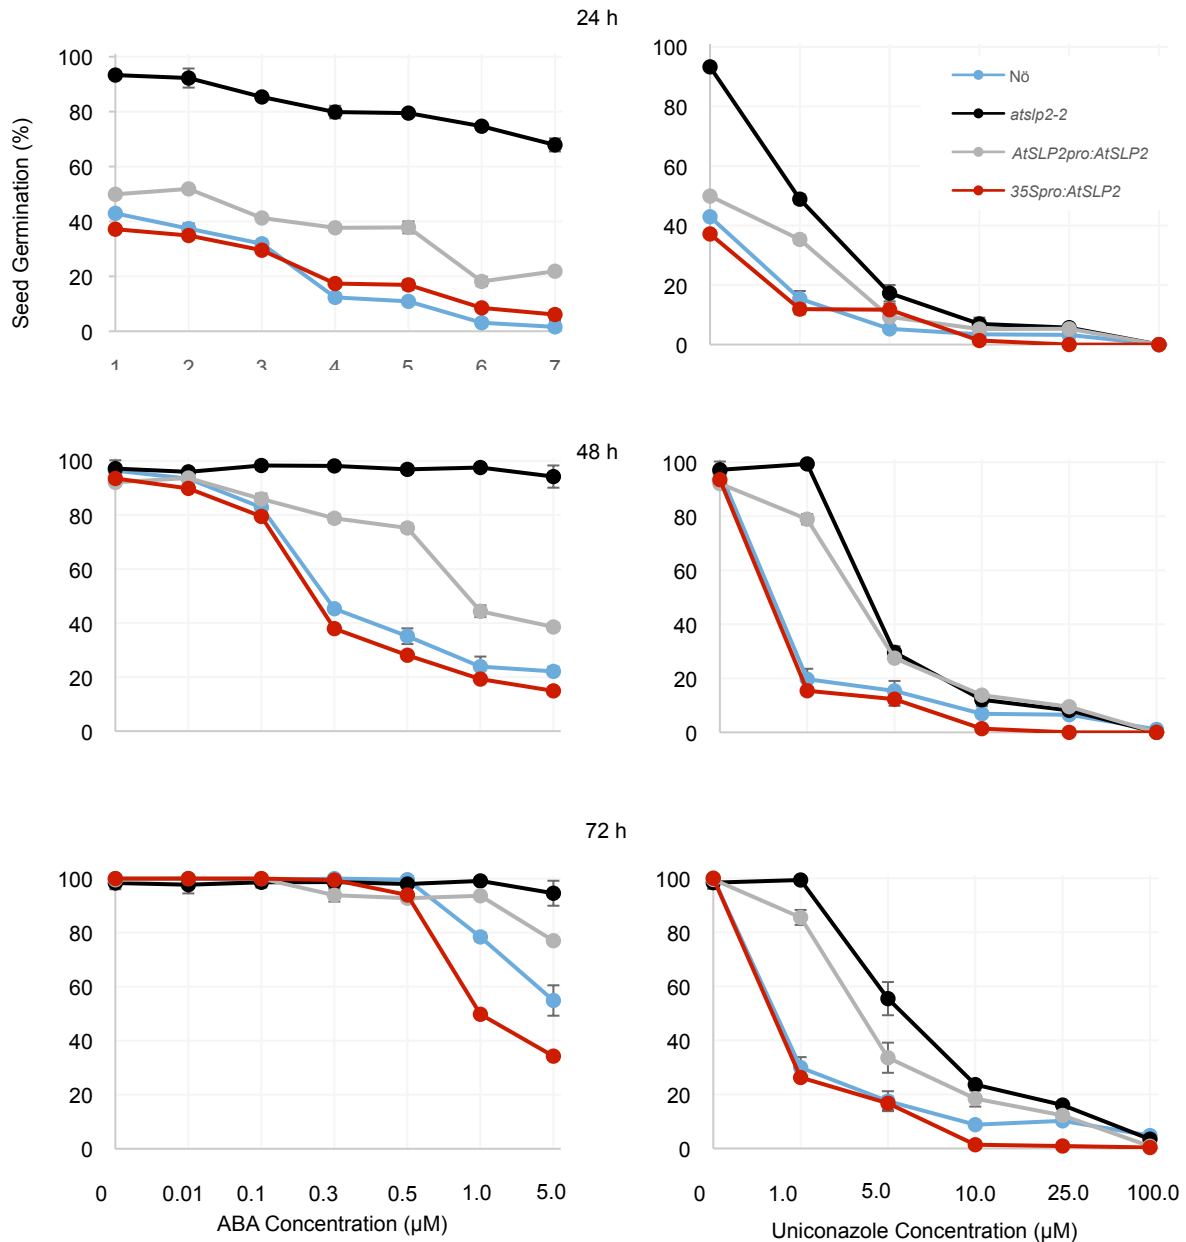

**Supplemental Figure S9. Quantitative time-course measurement of seed germination on 0.5 x MS-agar plates containing ABA or Uniconazole.** Control plates consisted of 0.5 x MS only. WT NÖ (blue), *atslp2-2* (black), *AtSLP2<sub>pro</sub>::AtSLP2* (grey) and *35S<sub>pro</sub>::AtSLP2* (red) are depicted. All seeds were imbibed at 4°C for 48 h on each plate prior to germination under 16 h light : 8 h dark at 23°C. Error bars represent  $\pm$  standard error (n=3 plates of 80-120 seeds each).

## Supplemental Figure S10

**A**

AtSLP2 (At1g18480)

ABA Application During Seed Imbibition

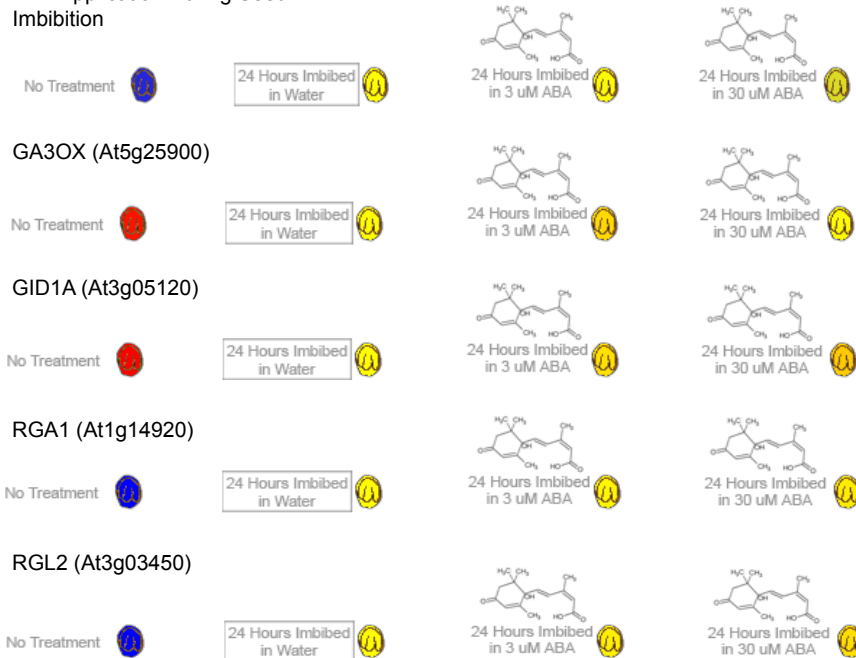

**B**

AtSLP2 (At1g18480)

GA Application During Seed Imbibition

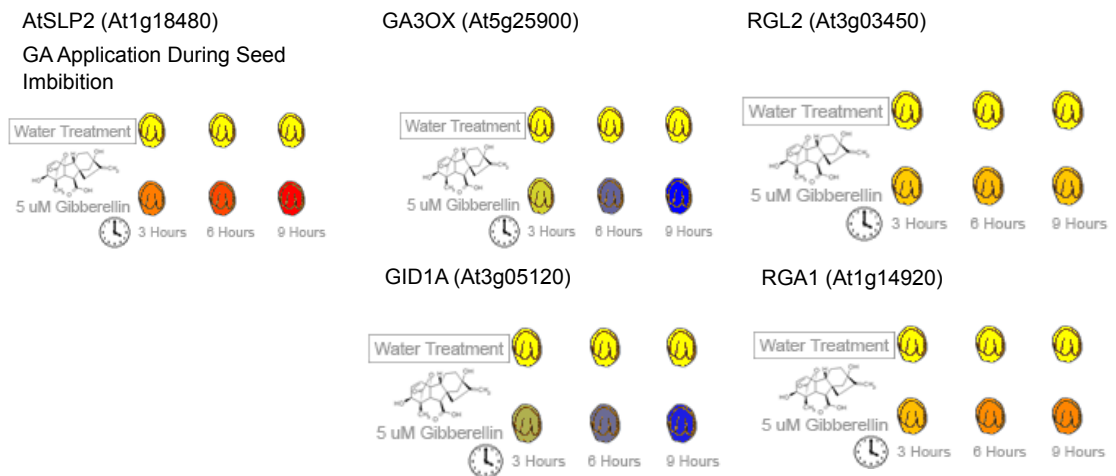

**Supplemental Figure S10. Relative transcriptional expression of GA-related biosynthetic and signaling proteins from Biological Arabidopsis Resource (BAR).** A, Changes in post-imbibition (48 h) GA-related gene expression in response to the presence of ABA. B, Changes in post-imbibition (48 h) GA-related gene expression in response to seed imbibition in the presence of GA. Gene identifiers (i.e. *AtSLP2*; *At1g18480*) are shown. Yellow represents no change, while different shades of red and blue represent a relative increase and decrease in transcript expression, respectively. All data were obtained from microarray experiments compiled at BAR (<http://bar.utoronto.ca/>).

## Supplemental Figure S11

A

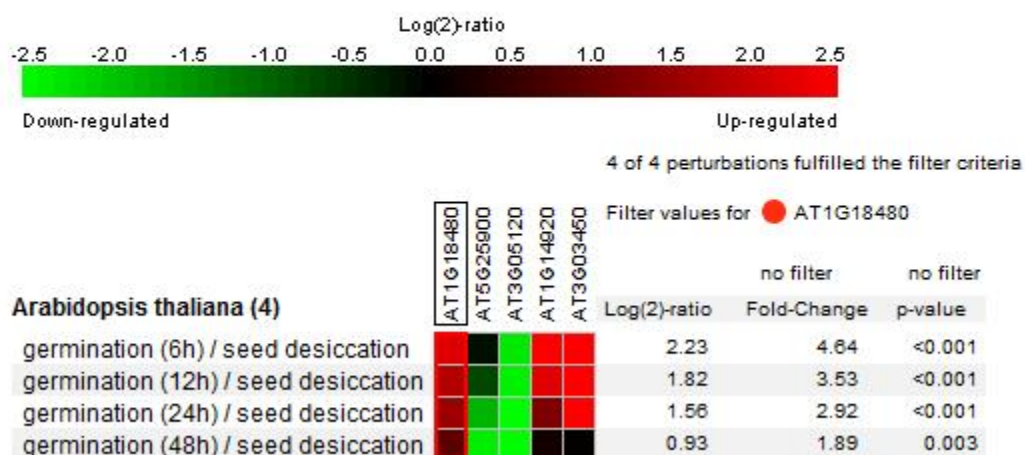

B

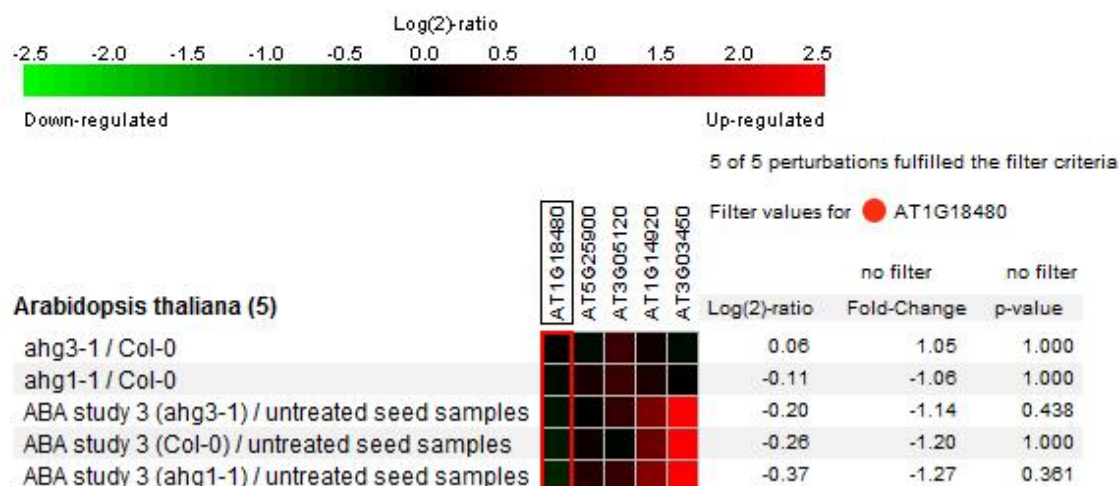

**Supplemental Figure S11. Relative transcriptional changes in GA-related biosynthetic and signaling proteins as well as AtSLP2 from Genevestigator.** A, Changes in post-imbibition (48 h) GA-related gene expression over a 48 h germination time-course of wild-type *A.thaliana* Col-0. B, Changes in post-imbibition (48 h) GA-related gene expression in response to the presence of 0.5  $\mu$ M ABA using both Col-0 and two ABA HYPERSENSITIVE GERMINATION (*ahg*) mutant plant lines. Gene identifiers (i.e. *AtSLP2*; *At1g18480*) are shown. All data was obtained from microarray data compiled at Genevestigator (<https://genevestigator.com/gv/>).

# Supplemental Figure S12

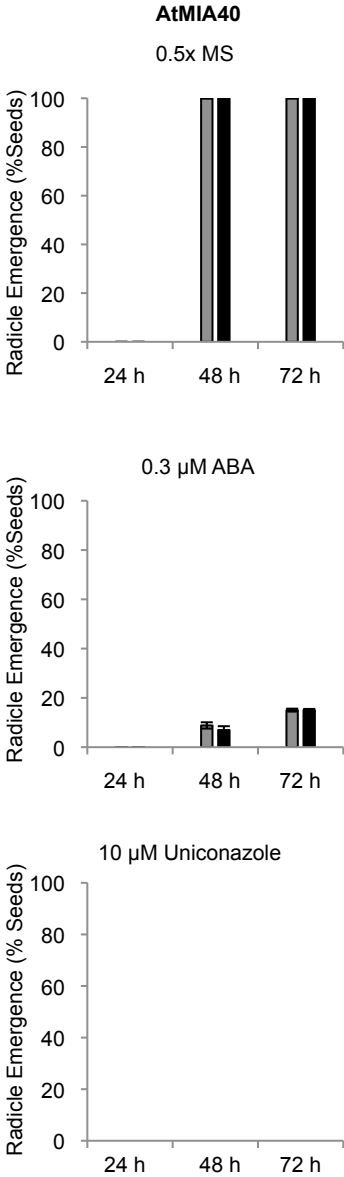

**Supplemental Figure S12. Quantitative measurement of seed germination on 0.5 x MS-agar plates containing ABA or Uniconazole.** Control plates consisted of 0.5 x MS only. Germination of *atmia40* (grey; left) and WT Col-0 (black; right) seeds is shown. Seed germination was equal across all seed types and conditions. All seeds were imbibed at 4°C for 48 h on each plate prior to germination under 16 h light: 8 h dark at 23°C. Error bars represent ± standard error (n=3 plates of 100-150 seeds each).
